# Supplementary material for: Dietary Cholesterol, Lipid Levels, and Cardiovascular Risk among Adults with Diabetes or Impaired Fasting Glucose in the Framingham Offspring Study
Source: PubMed Central journal article supplement (PMC6024517; doi:10.3390/nu10060770), 2018-06-14
Supplement: nutrients-10-00770-s001.pdf [file nutrients-10-00770-s001.pdf]

**Supplementary Table 1. Evaluating the intermediate effects of lipids on CVD risk among Framingham Offspring adults with Impaired Fasting Glucose or Type 2 Diabetes**

|                                     | Model 1 |           | Model 2 |           | Model 3 |           |
|-------------------------------------|---------|-----------|---------|-----------|---------|-----------|
| Dietary                             |         |           |         |           |         |           |
| Cholesterol (Sex-specific tertiles) | HR      | 95% CI    | HR      | 95% CI    | HR      | 95% CI    |
| <b>Low</b>                          | 1.00    | -         | 1.00    | -         | 1.00    | -         |
| <b>Moderate</b>                     | 0.95    | 0.68-1.32 | 0.93    | 0.67-1.31 | 0.95    | 0.68-1.33 |
| <b>High</b>                         | 0.62    | 0.41-0.91 | 0.62    | 0.42-0.91 | 0.61    | 0.41-0.90 |

Abbreviation: HR, hazard ratio. CI: confidence interval.

Model 1: Adjusted for age, sex, pack-years of smoking, waist circumference, percent of energy from carbohydrates and saturated fat, use of lipid-lowering medications, and LDL-cholesterol.

Model 2: : Adjusted for age, sex, pack-years of smoking, waist circumference, percent of energy from carbohydrates and saturated fat, use of lipid-lowering medications, and log of triglycerides.

Model 3: Adjusted for age, sex, pack-years of smoking, waist circumference, percent of energy from carbohydrates and saturated fat, use of lipid-lowering medications, and HDL-cholesterol.
